# Supplementary material for: Simulating out-of-sample atmospheric transport to enable flux inversions
Source: Copernicus journal article supplement (doi:10.5194/egusphere-2025-3441), 2025-07-24
Supplement: Supplementary file 1 [file egusphere-2025-3441-supplement.pdf]

1      **Supplementary Materials for “Simulating out-of-sample**  
2      **atmospheric transport to enable flux inversions”**

3   **1   Complete training data (in-sample FootNet)**

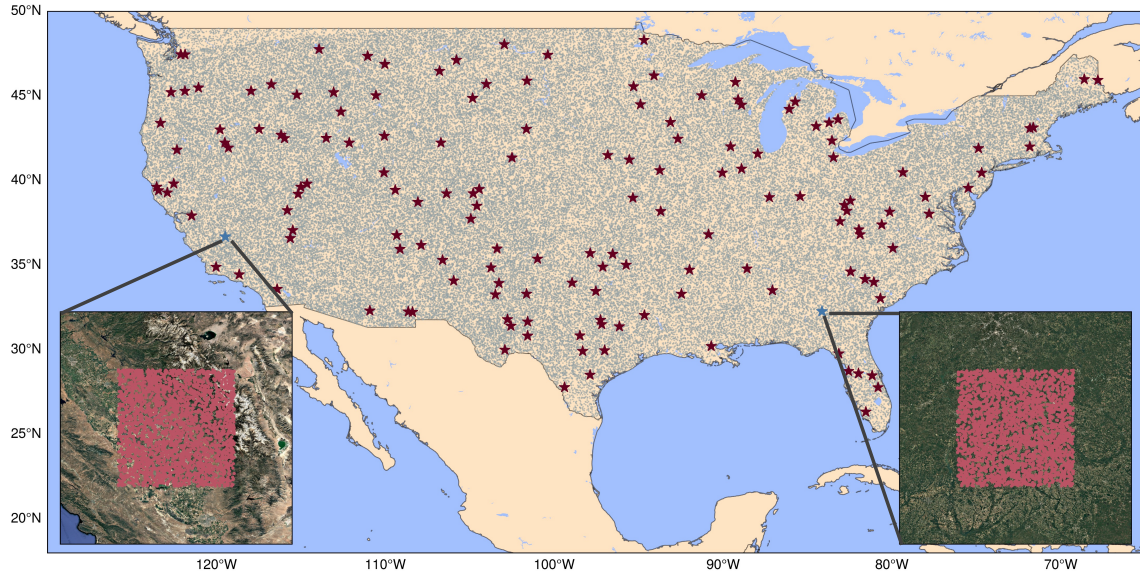

Figure S1: Receptor locations sampled for the in-sample FootNet model training. The grey dots represent pseudo-observations randomly sampled across the entire CONUS to ensure generalizability. The red stars represent randomly sampled 400 km×400 km regions in which further 2500 pseudo-observations were sampled. Background satellite imagery is taken from © Google Maps.

4   **2   Feature importance**

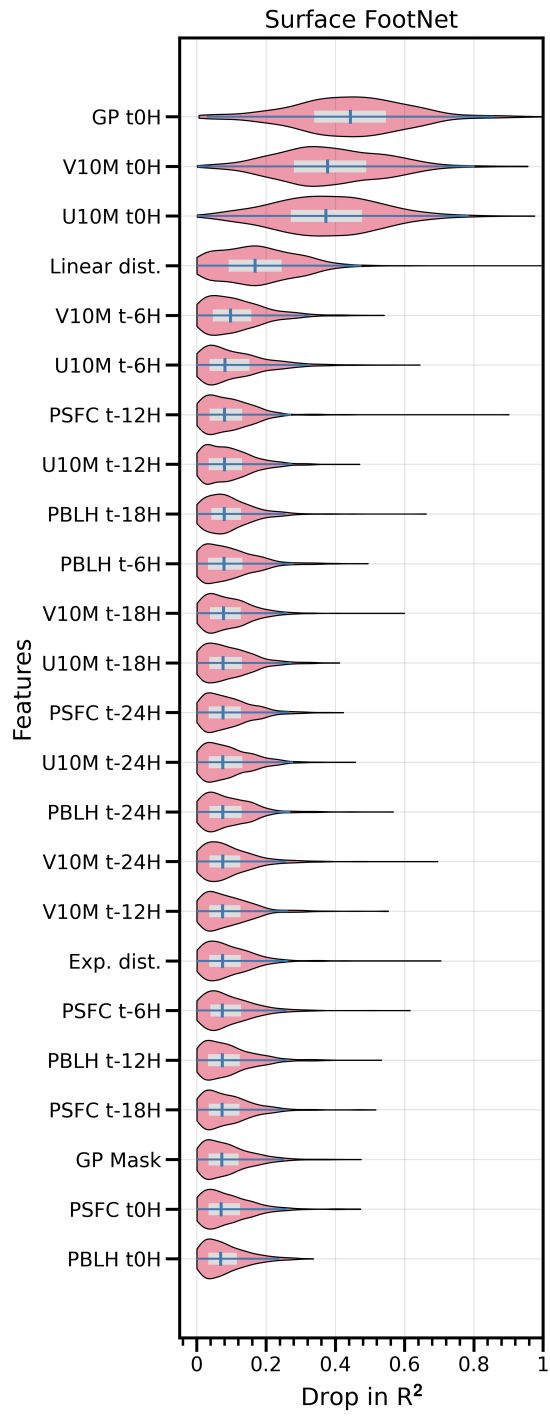

Figure S2: The complete feature importance analysis for Surface FootNet model.

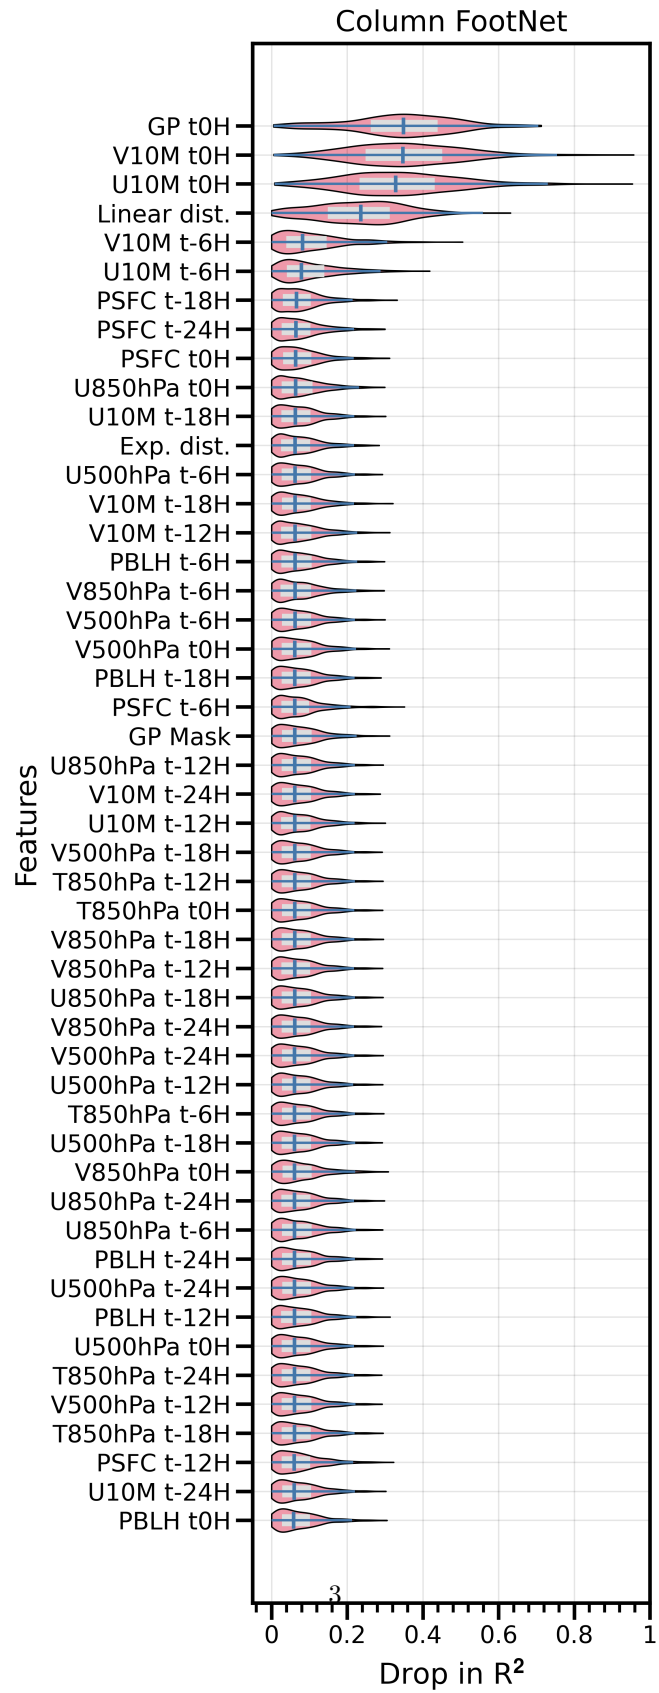

Figure S3: The complete feature importance analysis for Column FootNet model.
